# Supplementary material for: Hypoxia-specific anti-RAGE exosomes for nose-to-brain delivery of anti-miR-181a oligonucleotide in an ischemic stroke model
Source: Royal Society of Chemistry journal article supplement (doi:10.1039/d0nr07516g), 2021-01-01
Supplement: d0nr07516g3.pdf [file d0nr07516g3.pdf]

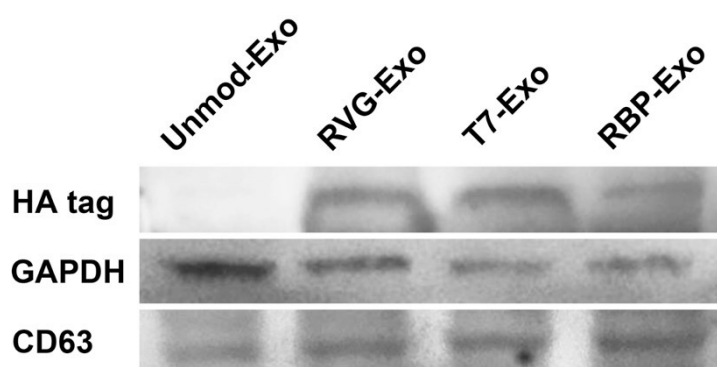

**Supplementary Figure 1. Western blot assay with anti-HA antibody**

Total proteins of RBP-Exo were isolated and separated by SDS-PAGE. The proteins were transferred to a PVDF membrane and incubated with anti-HA antibody to detect RBP-Lamp2b-HA. RVG-Exo and T7-Exo were used as positive controls, as previously reported (Kim G, Kim M, Lee Y, Byun JW, Hwang DW, Lee M. Systemic delivery of microRNA-21 antisense oligonucleotides to the brain using T7-peptide decorated exosomes. *J Control Release*. 2020; 317: 273-81; Kim M, Kim G, Hwang DW, Lee M. Delivery of high mobility group box-1 siRNA using brain-targeting exosomes for ischemic stroke therapy. *J Biomed Nanotechnol*. 2019; 15(12): 2401-12). RVG-Exo and T7-Exo were used as positive controls, because RVG-Lamp2b-HA and T7-Lamp2b-HA contained the HA tag as fusion proteins of Lamp2b. GAPDH was detected as an internal control. CD63 was detected as an exosome marker.

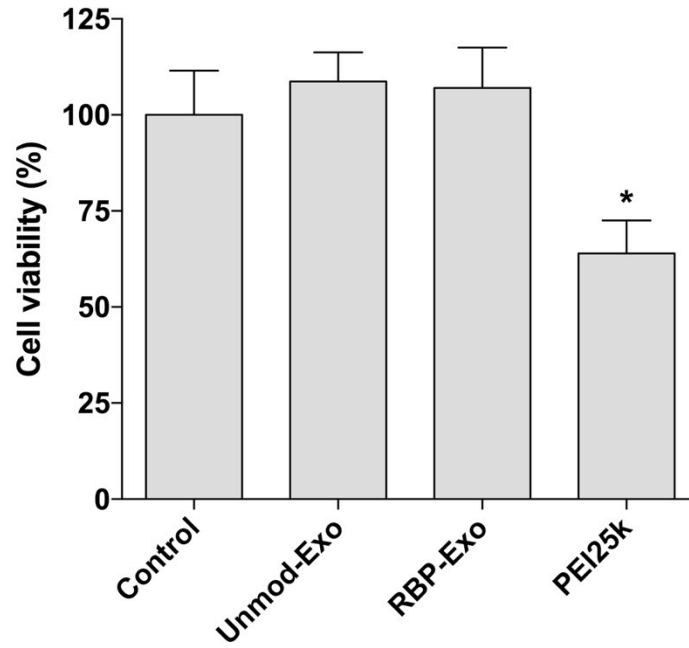

**Supplementary Figure 2. Cytotoxicity of exosomes and PEI25k**

RBP-Exo and Unmod-Exo without AMO181a were added to Neuro2A cells. After 24 h, the cytotoxicity of the exosomes was evaluated in the Neuro2A cells using an MTT assay. PEI25k was used as a control. The data are presented as the mean value  $\pm$  standard deviation of quadruplicate experiments. \* $P < 0.05$  compared with the other groups.

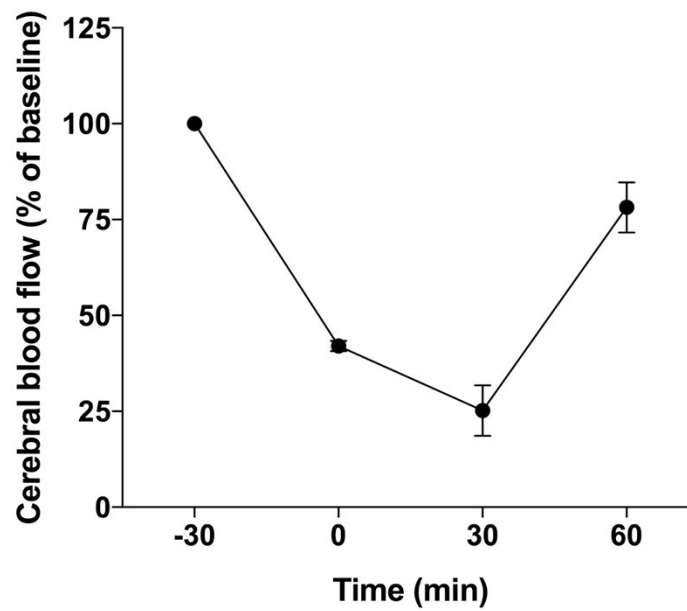

### Supplementary Figure 3. CBF in the MCAO rat model

CBF was measured in the MCAO rat model by laser Doppler flowmetry. The data are presented as the mean value  $\pm$  standard deviation of triplicate experiments.
