# Supplementary figures and images for: Hypoxia-specific anti-RAGE exosomes for nose-to-brain delivery of anti-miR-181a oligonucleotide in an ischemic stroke model
Source: Royal Society of Chemistry journal article supplement (doi:10.1039/d0nr07516g), 2021-01-01

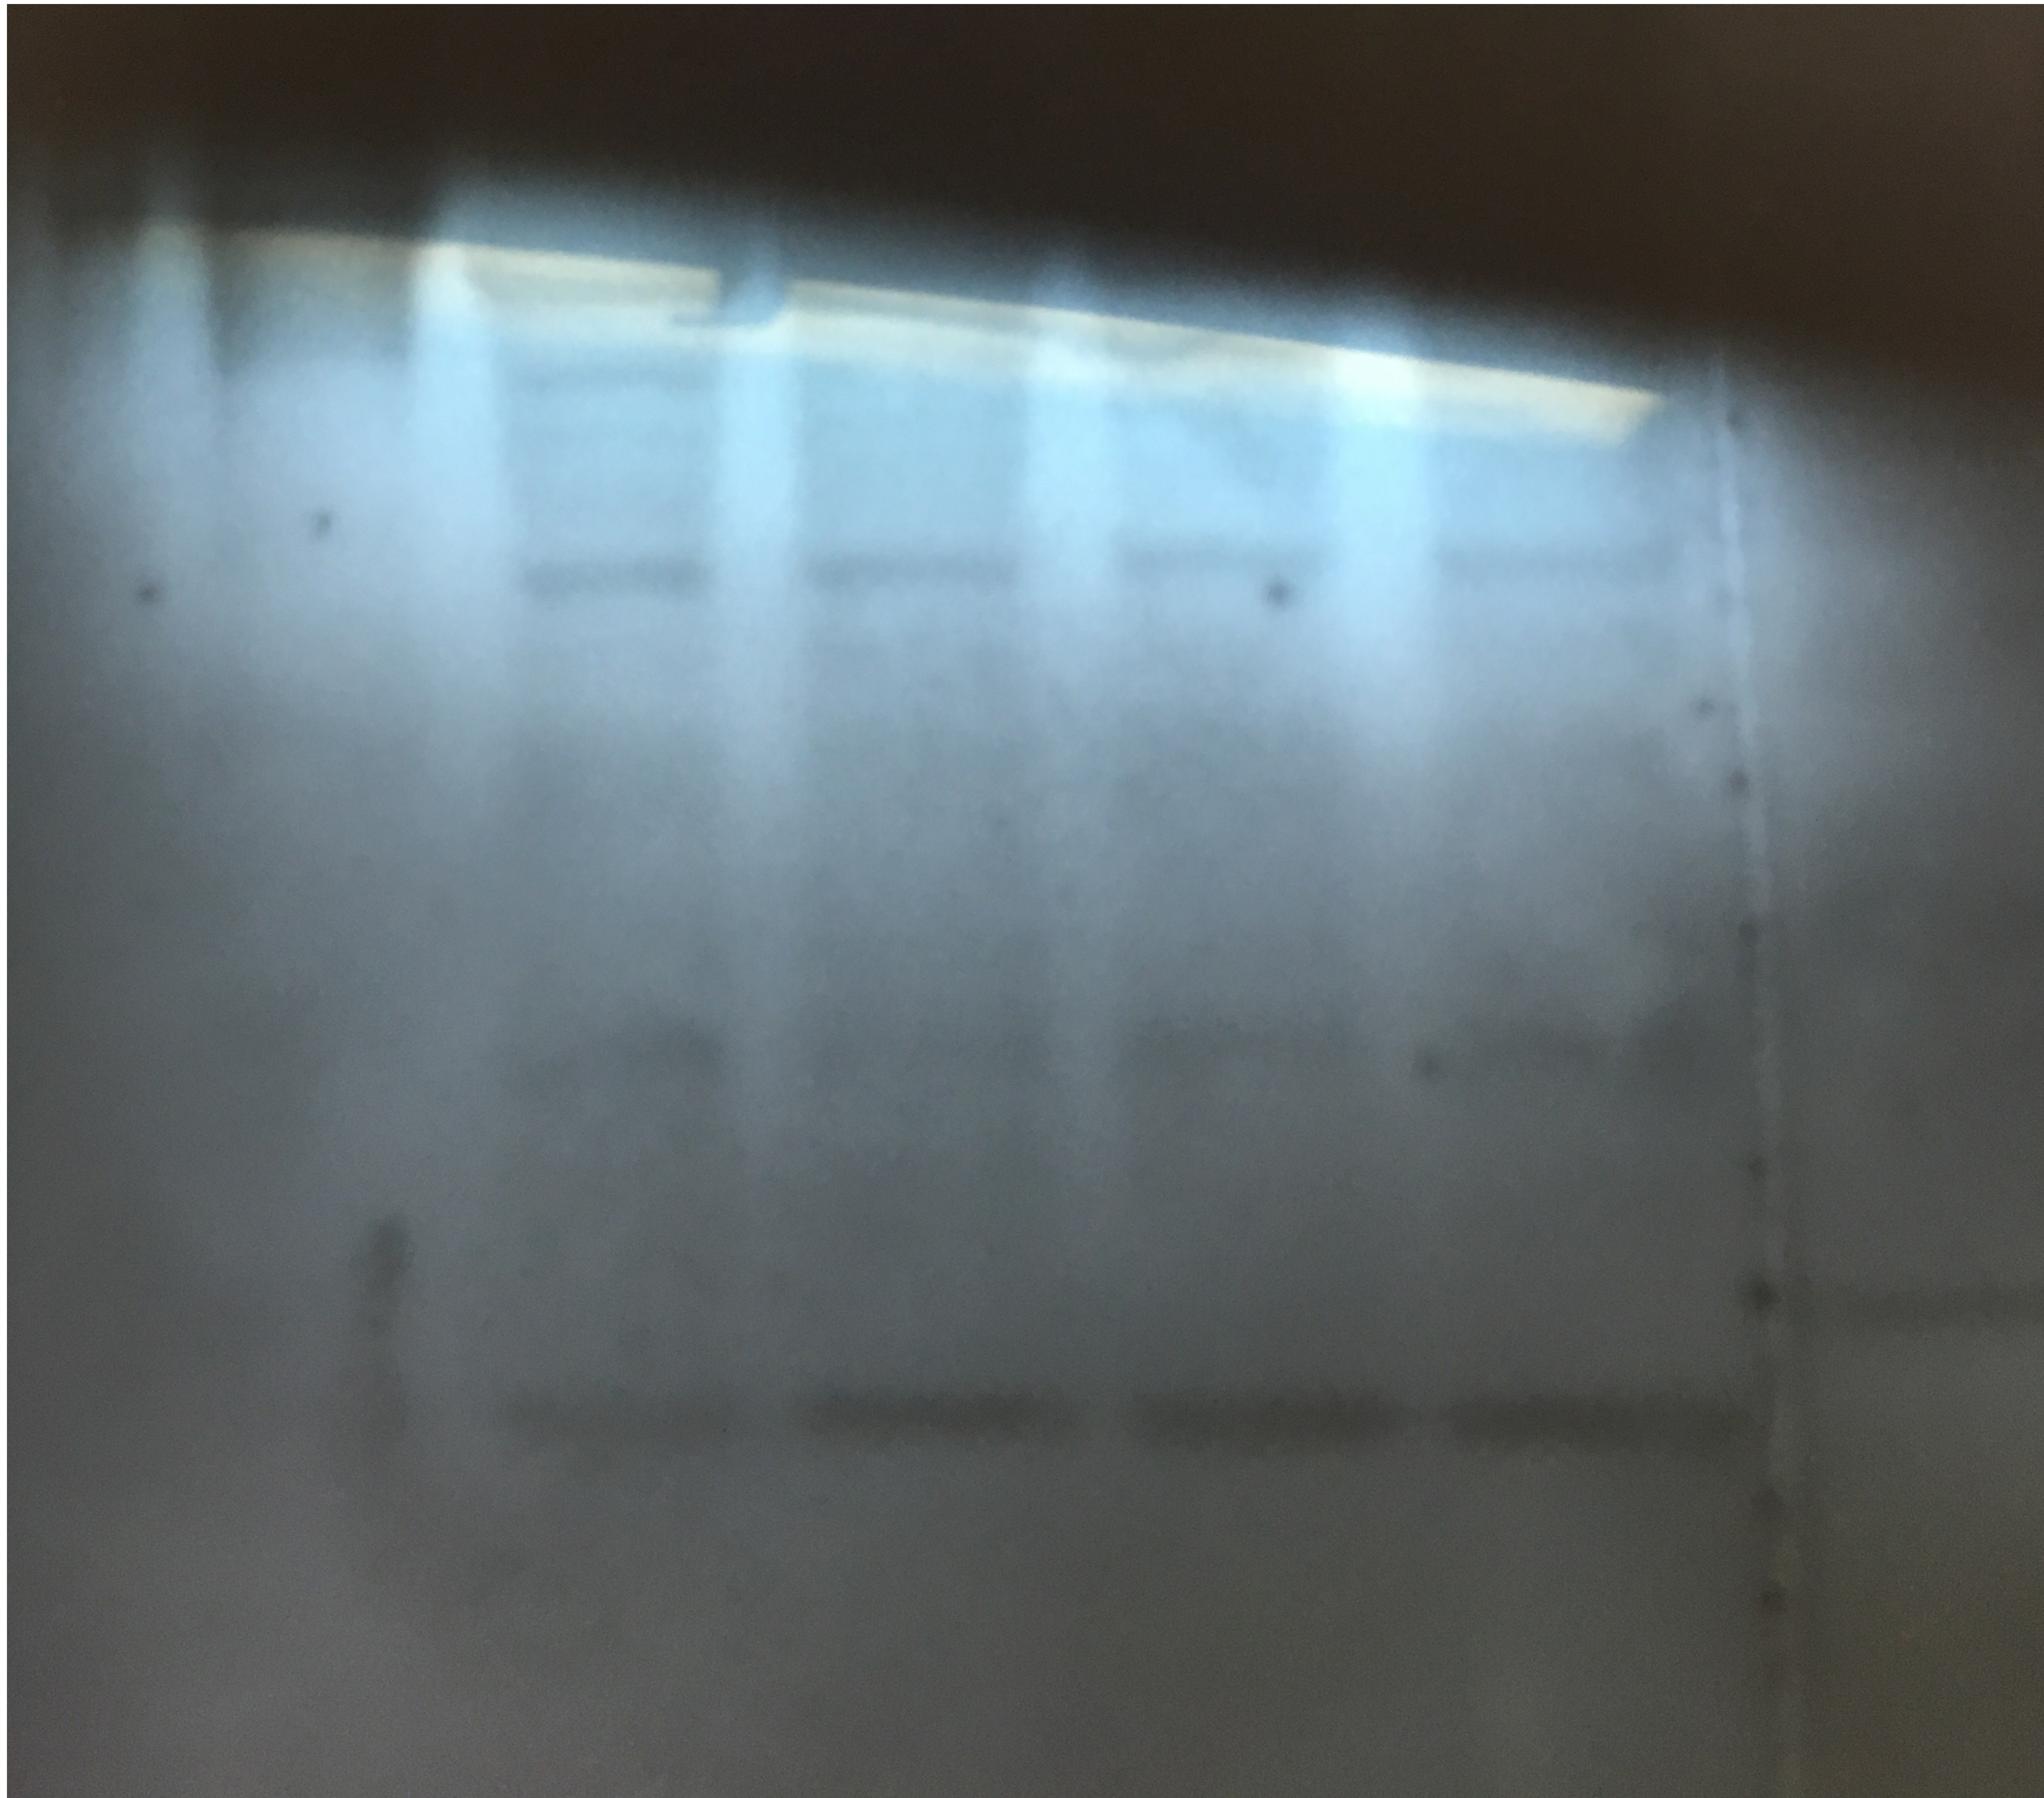

Supplement: d0nr07516g4.pdf [file d0nr07516g4.pdf]

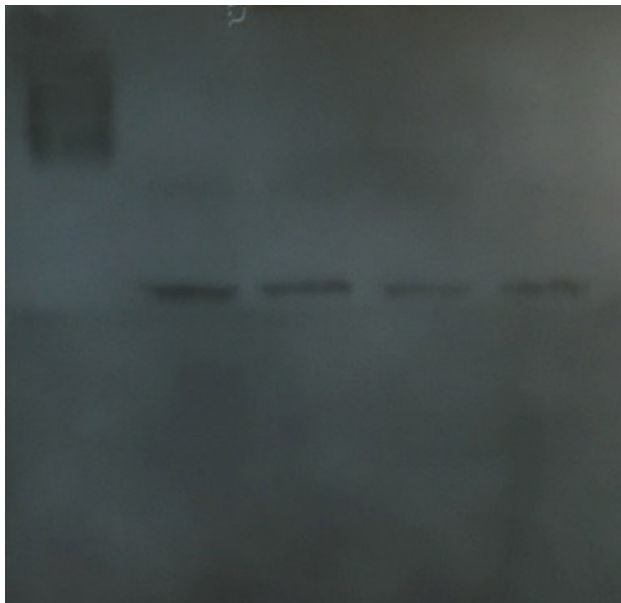

Supplement: d0nr07516g5.pdf [file d0nr07516g5.pdf]

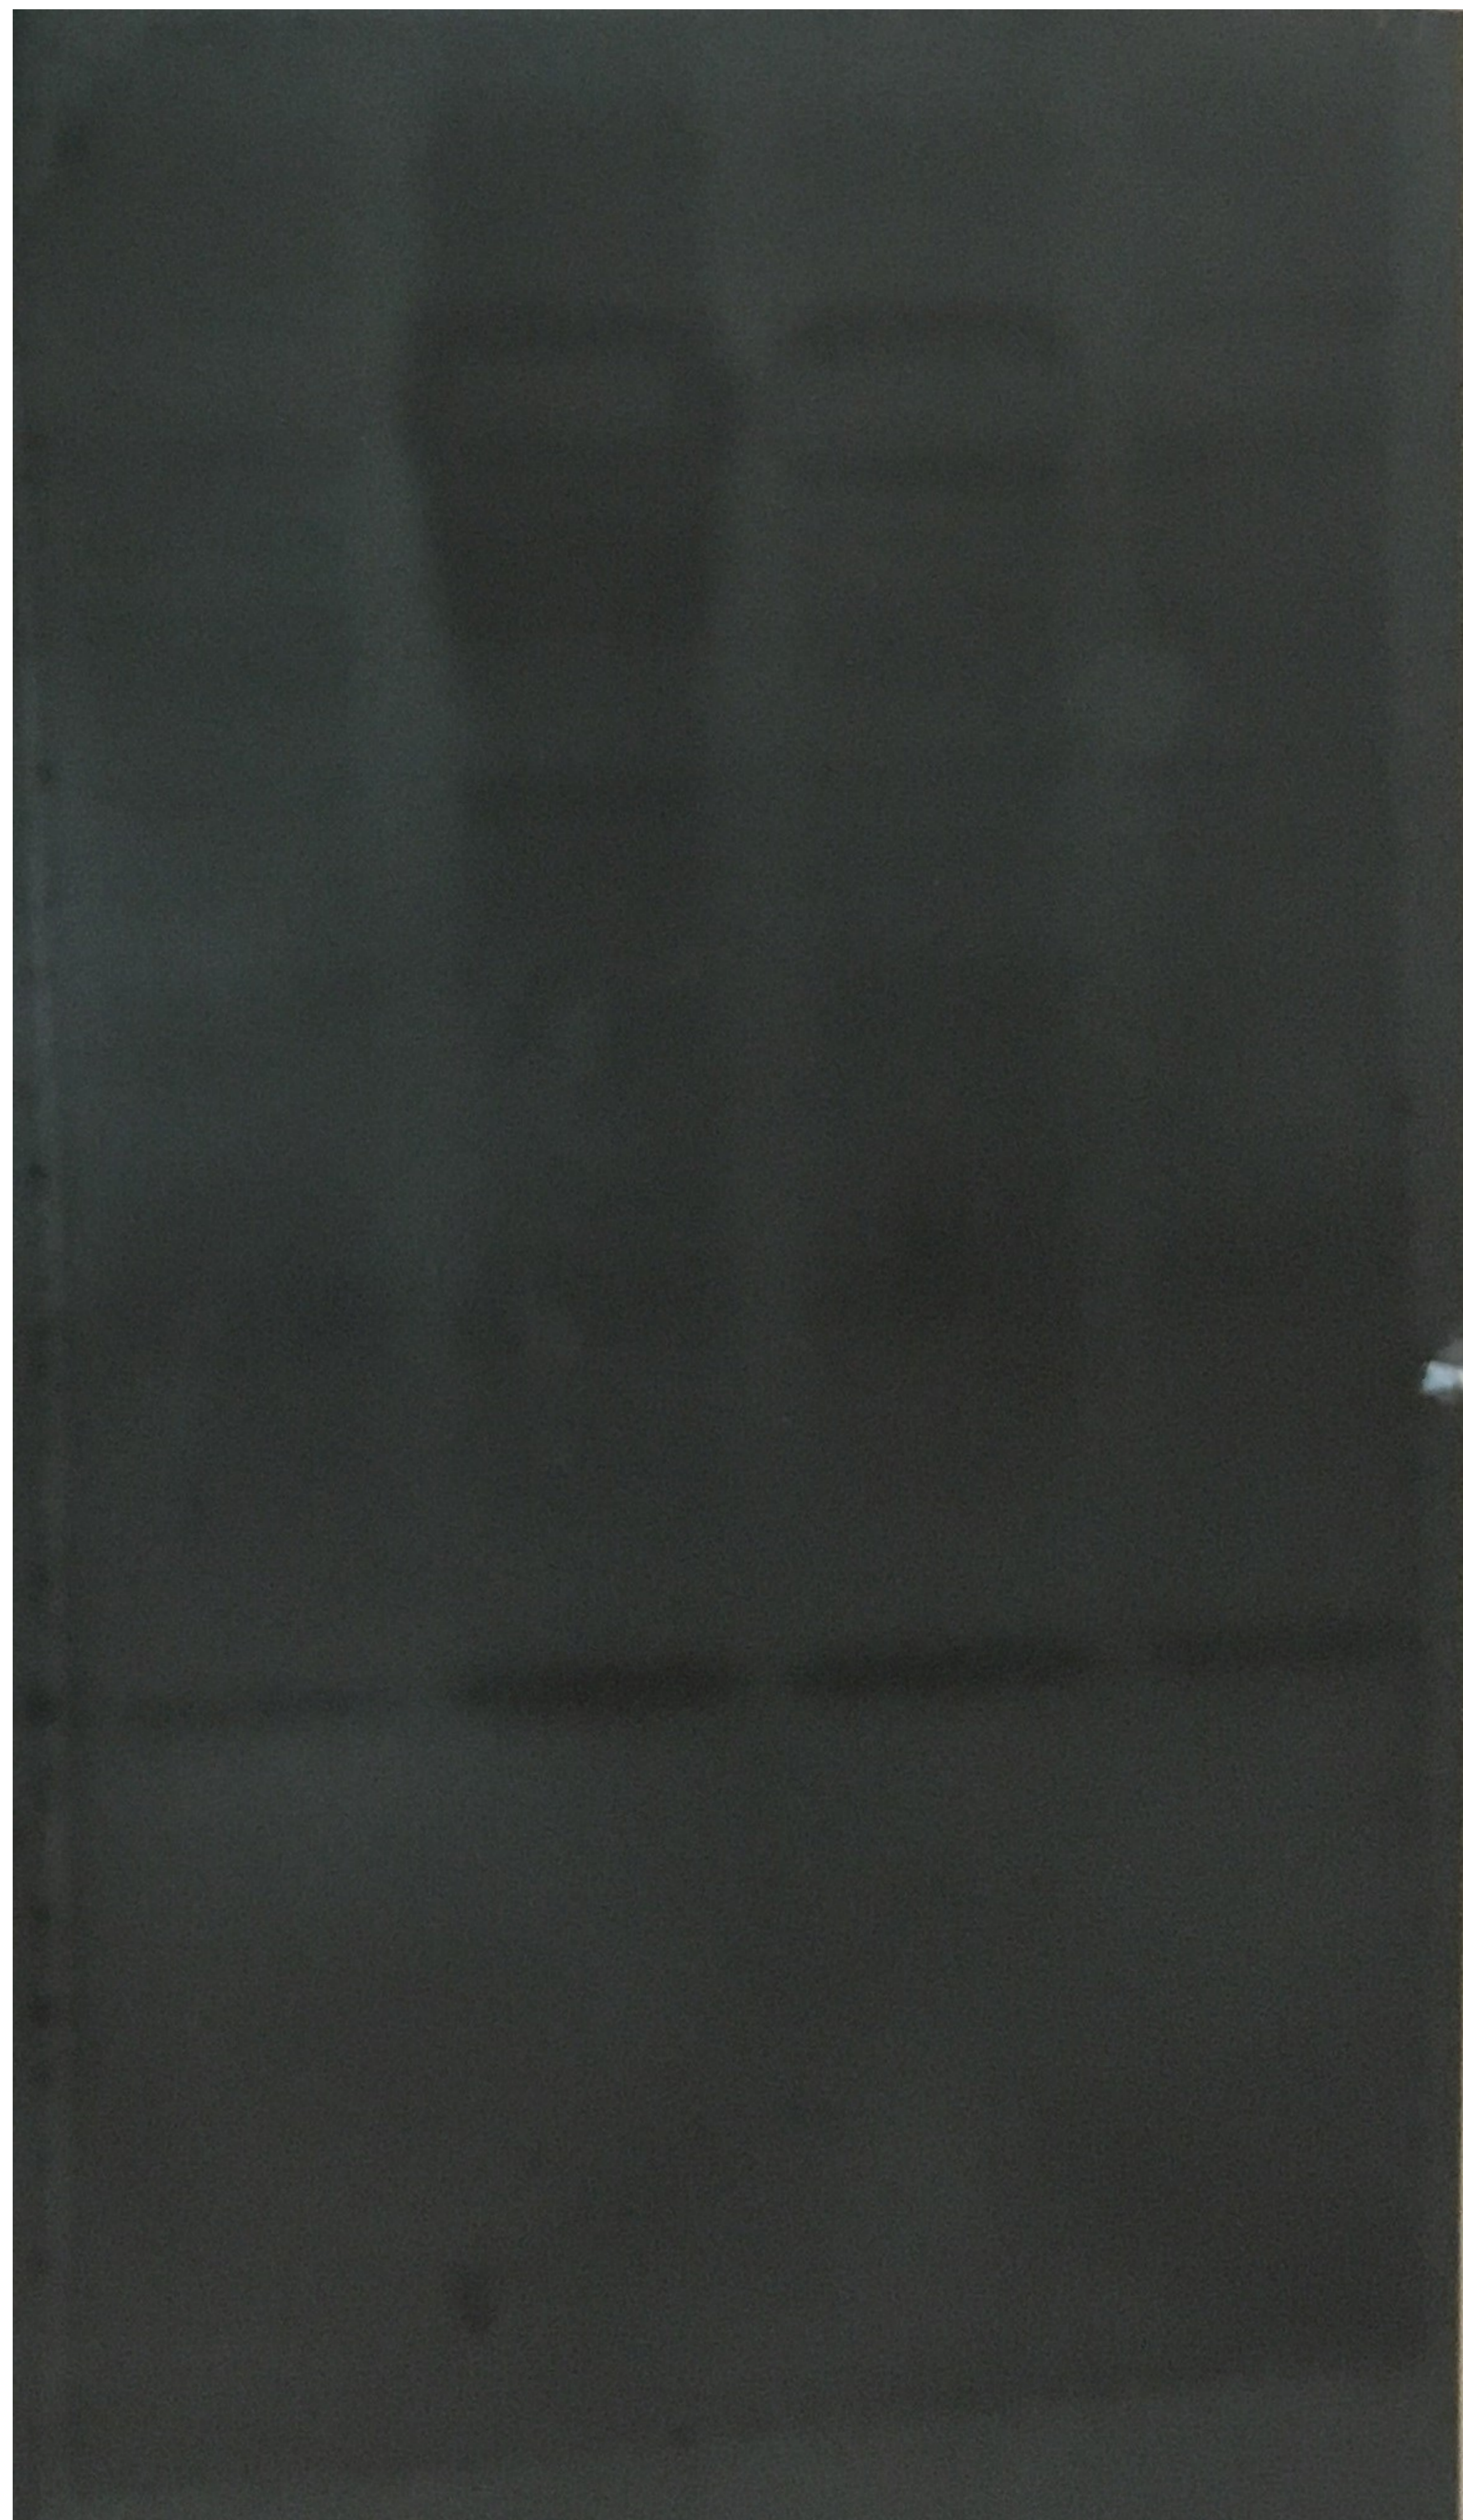

Supplement: d0nr07516g6.pdf [file d0nr07516g6.pdf]
